# Supplementary material for: Sequence analyses at mitochondrial and nuclear loci reveal a novel Theileria sp. and aid in the phylogenetic resolution of piroplasms from Australian marsupials and ticks
Source: PubMed Central journal article supplement (PMC6919580; doi:10.1371/journal.pone.0225822), 2019-12-18
Supplement: pone.0225822.s003.pdf [file pone.0225822.s003.pdf]

|                                   | Q2367 | Q2031b | Q1349 | Q1356 | TP13  | Theileria sp. B16 | Theileria sp. B60 | Theileria paparinii | P92   | P68   | Theileria apogeana | Babesia sp. BP1 | Babesia sp. B7 | Babesia lohiae | Babesia gibsoni | Babesia gibsoni (AB499087) | Babesia canis canis (KC207822) | Babesia canis vogeli (KC207825) | Babesia canis rossii (KC207823) | Babesia caballi (AB499086) | Babesia sp. Coco (KC207824) | Babesia bigemina (AB499085) | Theileria annulata (AB499088) | Theileria parva (AB499089) | Cytauxzoon felis (KC207821) | Theileria orientalis (AB499090) | Babesia conradae (KC207826) | Babesia microti (AB624353) | Babesia microti (LN871600) | Babesia cf. microti (AB624353) | Babesia rosthaini (AB624357) | Theileria equi (AB499091) | Plasmodium falciparum (AY283019) |  |  |
|-----------------------------------|-------|--------|-------|-------|-------|-------------------|-------------------|---------------------|-------|-------|--------------------|-----------------|----------------|----------------|-----------------|----------------------------|--------------------------------|---------------------------------|---------------------------------|----------------------------|-----------------------------|-----------------------------|-------------------------------|----------------------------|-----------------------------|---------------------------------|-----------------------------|----------------------------|----------------------------|--------------------------------|------------------------------|---------------------------|----------------------------------|--|--|
| Q2367                             | 0.8%  |        |       |       |       |                   |                   |                     |       |       |                    |                 |                |                |                 |                            |                                |                                 |                                 |                            |                             |                             |                               |                            |                             |                                 |                             |                            |                            |                                |                              |                           |                                  |  |  |
| Q2031b                            | 0.8%  | 0.0%   |       |       |       |                   |                   |                     |       |       |                    |                 |                |                |                 |                            |                                |                                 |                                 |                            |                             |                             |                               |                            |                             |                                 |                             |                            |                            |                                |                              |                           |                                  |  |  |
| Q1349                             | 0.8%  | 0.0%   |       |       |       |                   |                   |                     |       |       |                    |                 |                |                |                 |                            |                                |                                 |                                 |                            |                             |                             |                               |                            |                             |                                 |                             |                            |                            |                                |                              |                           |                                  |  |  |
| Q1356                             | 1.5%  | 0.6%   | 0.6%  |       |       |                   |                   |                     |       |       |                    |                 |                |                |                 |                            |                                |                                 |                                 |                            |                             |                             |                               |                            |                             |                                 |                             |                            |                            |                                |                              |                           |                                  |  |  |
| TP13                              | 9.6%  | 9.9%   | 9.9%  | 9.6%  |       |                   |                   |                     |       |       |                    |                 |                |                |                 |                            |                                |                                 |                                 |                            |                             |                             |                               |                            |                             |                                 |                             |                            |                            |                                |                              |                           |                                  |  |  |
| Theileria sp. B16                 | 13.3% | 12.8%  | 12.8% | 12.2% | 12.5% |                   |                   |                     |       |       |                    |                 |                |                |                 |                            |                                |                                 |                                 |                            |                             |                             |                               |                            |                             |                                 |                             |                            |                            |                                |                              |                           |                                  |  |  |
| Theileria sp. B60                 | 13.8% | 13.3%  | 13.3% | 12.7% | 13.1% | 2.4%              |                   |                     |       |       |                    |                 |                |                |                 |                            |                                |                                 |                                 |                            |                             |                             |                               |                            |                             |                                 |                             |                            |                            |                                |                              |                           |                                  |  |  |
| Theileria paparinii               | 13.5% | 13.5%  | 13.5% | 12.8% | 12.3% | 11.5%             | 11.4%             |                     |       |       |                    |                 |                |                |                 |                            |                                |                                 |                                 |                            |                             |                             |                               |                            |                             |                                 |                             |                            |                            |                                |                              |                           |                                  |  |  |
| P92                               | 12.3% | 12.0%  | 12.0% | 11.7% | 10.6% | 14.9%             | 14.9%             | 14.1%               |       |       |                    |                 |                |                |                 |                            |                                |                                 |                                 |                            |                             |                             |                               |                            |                             |                                 |                             |                            |                            |                                |                              |                           |                                  |  |  |
| P68                               | 12.3% | 12.0%  | 12.0% | 11.7% | 10.6% | 14.9%             | 14.9%             | 14.1%               | 0.0%  |       |                    |                 |                |                |                 |                            |                                |                                 |                                 |                            |                             |                             |                               |                            |                             |                                 |                             |                            |                            |                                |                              |                           |                                  |  |  |
| Theileria apogeana                | 12.5% | 12.2%  | 12.2% | 11.9% | 11.5% | 14.9%             | 15.4%             | 13.8%               | 3.9%  | 3.9%  |                    |                 |                |                |                 |                            |                                |                                 |                                 |                            |                             |                             |                               |                            |                             |                                 |                             |                            |                            |                                |                              |                           |                                  |  |  |
| Babesia sp. BP1                   | 40.3% | 39.9%  | 39.9% | 39.4% | 38.5% | 39.6%             | 39.8%             | 38.8%               | 37.8% | 38.1% |                    |                 |                |                |                 |                            |                                |                                 |                                 |                            |                             |                             |                               |                            |                             |                                 |                             |                            |                            |                                |                              |                           |                                  |  |  |
| Babesia sp. B7                    | 39.9% | 39.6%  | 39.6% | 39.1% | 38.3% | 38.6%             | 38.8%             | 38.3%               | 37.0% | 37.5% | 7.3%               |                 |                |                |                 |                            |                                |                                 |                                 |                            |                             |                             |                               |                            |                             |                                 |                             |                            |                            |                                |                              |                           |                                  |  |  |
| Babesia lohiae                    | 39.9% | 39.6%  | 39.6% | 39.1% | 37.8% | 38.3%             | 38.5%             | 38.1%               | 36.9% | 36.9% | 37.3%              | 7.5%            | 0.8%           |                |                 |                            |                                |                                 |                                 |                            |                             |                             |                               |                            |                             |                                 |                             |                            |                            |                                |                              |                           |                                  |  |  |
| Babesia gibsoni                   | 36.5% | 36.4%  | 36.4% | 36.0% | 34.4% | 33.9%             | 33.8%             | 35.9%               | 35.1% | 35.1% | 29.9%              | 29.1%           | 29.2%          |                |                 |                            |                                |                                 |                                 |                            |                             |                             |                               |                            |                             |                                 |                             |                            |                            |                                |                              |                           |                                  |  |  |
| Babesia gibsoni (AB499087)        | 36.5% | 36.4%  | 36.4% | 36.0% | 34.4% | 33.9%             | 33.8%             | 35.9%               | 35.1% | 35.1% | 29.9%              | 29.1%           | 29.2%          | 0.0%           |                 |                            |                                |                                 |                                 |                            |                             |                             |                               |                            |                             |                                 |                             |                            |                            |                                |                              |                           |                                  |  |  |
| Babesia canis canis (KC207822)    | 37.7% | 37.5%  | 37.5% | 37.2% | 36.7% | 34.4%             | 34.7%             | 36.9%               | 36.5% | 36.5% | 35.2%              | 29.2%           | 27.1%          | 27.3%          | 15.7%           | 15.7%                      |                                |                                 |                                 |                            |                             |                             |                               |                            |                             |                                 |                             |                            |                            |                                |                              |                           |                                  |  |  |
| Babesia canis vogeli (KC207825)   | 39.9% | 39.8%  | 39.8% | 39.4% | 39.8% | 39.0%             | 39.1%             | 40.3%               | 39.0% | 39.0% | 38.1%              | 32.6%           | 31.2%          | 31.3%          | 22.6%           | 22.6%                      | 16.1%                          |                                 |                                 |                            |                             |                             |                               |                            |                             |                                 |                             |                            |                            |                                |                              |                           |                                  |  |  |
| Babesia canis rossii (KC207823)   | 41.1% | 40.7%  | 40.7% | 40.4% | 40.3% | 37.2%             | 37.5%             | 41.6%               | 40.4% | 40.4% | 40.9%              | 32.8%           | 31.2%          | 31.0%          | 23.1%           | 23.1%                      | 21.1%                          | 25.8%                           |                                 |                            |                             |                             |                               |                            |                             |                                 |                             |                            |                            |                                |                              |                           |                                  |  |  |
| Babesia caballi (AB499086)        | 38.0% | 38.0%  | 38.0% | 37.7% | 36.5% | 35.7%             | 36.0%             | 36.5%               | 36.9% | 36.9% | 37.7%              | 23.7%           | 22.9%          | 23.2%          | 26.9%           | 26.9%                      | 24.4%                          | 29.7%                           | 30.5%                           |                            |                             |                             |                               |                            |                             |                                 |                             |                            |                            |                                |                              |                           |                                  |  |  |
| Babesia sp. Coco (KC207824)       | 39.9% | 39.6%  | 39.6% | 39.1% | 38.8% | 36.7%             | 36.7%             | 39.0%               | 38.6% | 38.6% | 38.8%              | 23.1%           | 21.3%          | 21.3%          | 27.4%           | 27.4%                      | 26.3%                          | 31.3%                           | 28.2%                           | 19.2%                      |                             |                             |                               |                            |                             |                                 |                             |                            |                            |                                |                              |                           |                                  |  |  |
| Babesia bigemina (AB499085)       | 40.4% | 40.4%  | 40.4% | 39.9% | 38.3% | 37.8%             | 38.6%             | 40.3%               | 39.3% | 39.3% | 39.8%              | 23.4%           | 22.2%          | 22.2%          | 27.9%           | 27.9%                      | 26.1%                          | 32.0%                           | 27.9%                           | 22.2%                      | 18.7%                       |                             |                               |                            |                             |                                 |                             |                            |                            |                                |                              |                           |                                  |  |  |
| Babesia bovis (AB499088)          | 39.0% | 39.0%  | 39.0% | 38.5% | 37.8% | 37.2%             | 37.8%             | 38.8%               | 37.8% | 37.8% | 37.8%              | 30.2%           | 30.0%          | 29.7%          | 32.6%           | 32.6%                      | 31.5%                          | 36.9%                           | 36.4%                           | 27.9%                      | 29.1%                       | 26.1%                       |                               |                            |                             |                                 |                             |                            |                            |                                |                              |                           |                                  |  |  |
| Theileria annulata (NW 001091933) | 30.5% | 30.0%  | 30.0% | 29.9% | 29.5% | 28.1%             | 27.8%             | 29.2%               | 30.2% | 30.2% | 30.2%              | 41.6%           | 40.6%          | 40.9%          | 40.1%           | 40.1%                      | 40.1%                          | 44.2%                           | 41.9%                           | 41.9%                      | 40.6%                       | 42.4%                       | 42.4%                         |                            |                             |                                 |                             |                            |                            |                                |                              |                           |                                  |  |  |
| Theileria parva (AB499089)        | 29.7% | 29.5%  | 29.5% | 28.9% | 27.3% | 26.3%             | 26.9%             | 27.4%               | 28.4% | 28.4% | 28.9%              | 42.0%           | 42.0%          | 42.2%          | 40.9%           | 40.9%                      | 41.6%                          | 44.6%                           | 40.9%                           | 40.7%                      | 42.5%                       | 42.7%                       | 43.2%                         | 19.6%                      |                             |                                 |                             |                            |                            |                                |                              |                           |                                  |  |  |
| Cytauxzoon felis (KC207821)       | 28.2% | 27.6%  | 27.6% | 27.3% | 25.8% | 28.1%             | 28.1%             | 27.6%               | 26.8% | 26.8% | 27.1%              | 39.6%           | 39.0%          | 39.1%          | 38.0%           | 38.0%                      | 36.9%                          | 41.2%                           | 38.0%                           | 37.7%                      | 37.2%                       | 40.9%                       | 39.3%                         | 29.9%                      | 27.8%                       |                                 |                             |                            |                            |                                |                              |                           |                                  |  |  |
| Theileria orientalis (AB499090)   | 31.5% | 30.8%  | 30.8% | 30.4% | 28.7% | 27.6%             | 27.4%             | 30.0%               | 31.8% | 31.8% | 31.8%              | 42.2%           | 41.7%          | 41.7%          | 40.1%           | 40.1%                      | 41.1%                          | 44.0%                           | 41.9%                           | 42.4%                      | 42.4%                       | 42.7%                       | 43.8%                         | 24.8%                      | 24.7%                       | 30.5%                           |                             |                            |                            |                                |                              |                           |                                  |  |  |
| Babesia conradae (KC207826)       | 55.8% | 55.4%  | 55.4% | 55.2% | 55.7% | 55.7%             | 55.4%             | 55.8%               | 54.7% | 54.7% | 54.9%              | 55.4%           | 54.1%          | 54.2%          | 57.3%           | 57.3%                      | 56.3%                          | 57.1%                           | 56.3%                           | 55.2%                      | 53.9%                       | 59.3%                       | 58.4%                         | 57.0%                      | 55.4%                       | 55.5%                           | 55.7%                       |                            |                            |                                |                              |                           |                                  |  |  |
| Babesia microti (LN871600)        | 52.6% | 52.1%  | 52.1% | 52.3% | 51.6% | 52.8%             | 53.9%             | 53.7%               | 53.6% | 53.6% | 53.4%              | 53.2%           | 53.9%          | 53.9%          | 52.8%           | 52.8%                      | 54.4%                          | 52.3%                           | 52.6%                           | 53.9%                      | 53.2%                       | 55.0%                       | 56.0%                         | 55.7%                      | 54.9%                       | 53.2%                           | 54.9%                       | 53.2%                      | 55.0%                      | 56.0%                          | 55.7%                        | 54.9%                     | 63.6%                            |  |  |
| Babesia microti (AB624353)        | 53.6% | 53.6%  | 53.6% | 53.7% | 52.9% | 54.4%             | 55.7%             | 54.5%               | 55.0% | 55.0% | 54.9%              | 54.9%           | 55.4%          | 55.4%          | 54.2%           | 54.2%                      | 55.7%                          | 54.7%                           | 55.8%                           | 54.9%                      | 54.7%                       | 53.9%                       | 55.7%                         | 56.0%                      | 56.7%                       | 53.9%                           | 56.0%                       | 67.0%                      | 16.7%                      |                                |                              |                           |                                  |  |  |
| Babesia cf. microti (AB624353)    | 53.1% | 53.2%  | 53.2% | 53.1% | 51.6% | 53.9%             | 54.7%             | 53.7%               | 53.7% | 53.7% | 52.9%              | 55.2%           | 55.2%          | 55.2%          | 54.4%           | 54.4%                      | 55.4%                          | 53.7%                           | 56.3%                           | 56.2%                      | 55.8%                       | 54.4%                       | 56.2%                         | 55.5%                      | 56.0%                       | 54.4%                           | 55.4%                       | 63.0%                      | 18.0%                      | 20.9%                          |                              |                           |                                  |  |  |
| Babesia rosthaini (AB624357)      | 53.6% | 53.6%  | 53.6% | 53.4% | 51.3% | 51.3%             | 51.8%             | 52.4%               | 52.1% | 52.1% | 52.9%              | 52.8%           | 52.8%          | 52.8%          | 50.8%           | 50.8%                      | 52.1%                          | 53.4%                           | 55.2%                           | 54.5%                      | 52.3%                       | 54.9%                       | 57.0%                         | 52.9%                      | 53.2%                       | 52.4%                           | 51.1%                       | 62.8%                      | 41.4%                      | 40.6%                          | 39.1%                        |                           |                                  |  |  |
| Theileria equi (AB499091)         | 58.6% | 58.1%  | 58.1% | 57.9% | 58.3% | 57.4%             | 57.9%             | 58.1%               | 57.2% | 57.2% | 57.4%              | 63.1%           | 60.7%          | 60.5%          | 60.2%           | 60.2%                      | 59.3%                          | 61.6%                           | 62.1%                           | 60.5%                      | 59.7%                       | 61.4%                       | 61.9%                         | 58.3%                      | 60.0%                       | 58.8%                           | 56.0%                       | 59.8%                      | 62.1%                      | 63.7%                          | 62.1%                        | 60.0%                     |                                  |  |  |
| Plasmodium falciparum (AY283019)  | 55.4% | 55.1%  | 55.1% | 54.7% | 54.4% | 52.5%             | 52.8%             | 53.2%               | 54.7% | 54.7% | 55.3%              | 58.7%           | 56.5%          | 56.1%          | 57.3%           | 57.3%                      | 56.1%                          | 58.2%                           | 57.7%                           | 59.6%                      | 58.9%                       | 56.6%                       | 59.4%                         | 56.5%                      | 57.0%                       | 56.3%                           | 57.0%                       | 65.8%                      | 59.9%                      | 57.2%                          | 58.9%                        | 56.8%                     | 61.9%                            |  |  |
