# Supplementary material for: Sequence analyses at mitochondrial and nuclear loci reveal a novel Theileria sp. and aid in the phylogenetic resolution of piroplasms from Australian marsupials and ticks
Source: PLoS One. 2019 Dec 18;14(12):e0225822. doi: 10.1371/journal.pone.0225822 (PMC6919580; doi:10.1371/journal.pone.0225822)
Supplement: S2 Table — Analyses were conducted on a ~ 800 bp alignment using the Tamura-Nei model (Tamura and Nei, 1993). Duplicates were removed from the database therefore only one representative of each novel sequence/clade is shown. * indicates shorter sequences (~800 bp) obtained in this study using a nested PCR as described by Jefferies et. al. (2007). All other new sequences (~1.3 kb) were obtained using primers Nbab_1F and 18S ApiR (Greay et al., 2018). (PDF) [file pone.0225822.s002.pdf]

|                                      | TP13 - CLADE B<br>TP8 - CLADE B<br>Theileria sp.(EF554395)<br>Theileria paparinii (MG758115)<br>Theileria penicillata (DQ437687)<br>Theileria sp. K1 (JQ682879)<br>Q2031b* - T. brachyuri CLADE<br>Q1340* - T. brachyuri CLADE<br>1051 - T. brachyuri CLADE<br>P92* and P68* - T. gilberti CLADE<br>Theileria gilberti (EF554394)<br>Q2031a - T. brachyuri CLADE<br>Theileria brachyuri (DQ437684)<br>Theileria sp. B16 (MG251437)<br>Theileria sp. B60 (MG251437)<br>Theileria sp. B43 (MG251439)<br>Theileria apogeana(MG758116)<br>Q2031b - CLADE E<br>Theileria worthingtonorum (MG758114)<br>P92 and P68 - CLADE D<br>Theileria sp. (MF576261)<br>Theileria sp. (MF136488)<br>Theileria palmeri (MG758113)<br>TB111 - CLADE A<br>TB105 - CLADE A<br>Q2377 - CLADE A<br>Theileria sp. (MF136494)<br>Theileria fuliginosa (DQ437686)<br>Theileria sp. (MF136493) |       |       |       |       |       |       |       |       |      |       |       |       |       |       |       |       |       |       |       |       |       |       |       |       |       |       |       |  |
|--------------------------------------|---------------------------------------------------------------------------------------------------------------------------------------------------------------------------------------------------------------------------------------------------------------------------------------------------------------------------------------------------------------------------------------------------------------------------------------------------------------------------------------------------------------------------------------------------------------------------------------------------------------------------------------------------------------------------------------------------------------------------------------------------------------------------------------------------------------------------------------------------------------------|-------|-------|-------|-------|-------|-------|-------|-------|------|-------|-------|-------|-------|-------|-------|-------|-------|-------|-------|-------|-------|-------|-------|-------|-------|-------|-------|--|
| TP13 - CLADE B                       |                                                                                                                                                                                                                                                                                                                                                                                                                                                                                                                                                                                                                                                                                                                                                                                                                                                                     |       |       |       |       |       |       |       |       |      |       |       |       |       |       |       |       |       |       |       |       |       |       |       |       |       |       |       |  |
| TP8 - CLADE B                        | 0.2%                                                                                                                                                                                                                                                                                                                                                                                                                                                                                                                                                                                                                                                                                                                                                                                                                                                                |       |       |       |       |       |       |       |       |      |       |       |       |       |       |       |       |       |       |       |       |       |       |       |       |       |       |       |  |
| Theileria sp.(EF554395)              | 0.2%                                                                                                                                                                                                                                                                                                                                                                                                                                                                                                                                                                                                                                                                                                                                                                                                                                                                | 0.0%  |       |       |       |       |       |       |       |      |       |       |       |       |       |       |       |       |       |       |       |       |       |       |       |       |       |       |  |
| Theileria paparinii (MG758115)       | 0.2%                                                                                                                                                                                                                                                                                                                                                                                                                                                                                                                                                                                                                                                                                                                                                                                                                                                                | 0.0%  | 0.0%  |       |       |       |       |       |       |      |       |       |       |       |       |       |       |       |       |       |       |       |       |       |       |       |       |       |  |
| Theileria penicillata (DQ437687)     | 0.6%                                                                                                                                                                                                                                                                                                                                                                                                                                                                                                                                                                                                                                                                                                                                                                                                                                                                | 0.4%  | 0.4%  | 0.4%  |       |       |       |       |       |      |       |       |       |       |       |       |       |       |       |       |       |       |       |       |       |       |       |       |  |
| Theileria sp. K1 (JQ682879)          | 0.8%                                                                                                                                                                                                                                                                                                                                                                                                                                                                                                                                                                                                                                                                                                                                                                                                                                                                | 0.6%  | 0.6%  | 0.6%  | 0.2%  |       |       |       |       |      |       |       |       |       |       |       |       |       |       |       |       |       |       |       |       |       |       |       |  |
| Q2031b* - T. brachyuri CLADE         | 1.7%                                                                                                                                                                                                                                                                                                                                                                                                                                                                                                                                                                                                                                                                                                                                                                                                                                                                | 1.4%  | 1.4%  | 1.4%  | 1.4%  | 1.2%  |       |       |       |      |       |       |       |       |       |       |       |       |       |       |       |       |       |       |       |       |       |       |  |
| Q1340* - T. brachyuri CLADE          | 1.7%                                                                                                                                                                                                                                                                                                                                                                                                                                                                                                                                                                                                                                                                                                                                                                                                                                                                | 1.4%  | 1.4%  | 1.4%  | 1.4%  | 1.2%  | 0.0%  |       |       |      |       |       |       |       |       |       |       |       |       |       |       |       |       |       |       |       |       |       |  |
| 1051 - T. brachyuri CLADE            | 1.7%                                                                                                                                                                                                                                                                                                                                                                                                                                                                                                                                                                                                                                                                                                                                                                                                                                                                | 1.4%  | 1.4%  | 1.4%  | 1.4%  | 1.2%  | 0.0%  | 0.0%  |       |      |       |       |       |       |       |       |       |       |       |       |       |       |       |       |       |       |       |       |  |
| P92* and P68* - T. gilberti CLADE    | 2.5%                                                                                                                                                                                                                                                                                                                                                                                                                                                                                                                                                                                                                                                                                                                                                                                                                                                                | 2.2%  | 2.2%  | 2.2%  | 2.2%  | 1.9%  | 0.6%  | 0.6%  | 0.6%  |      |       |       |       |       |       |       |       |       |       |       |       |       |       |       |       |       |       |       |  |
| Theileria gilberti (EF554394)        | 2.7%                                                                                                                                                                                                                                                                                                                                                                                                                                                                                                                                                                                                                                                                                                                                                                                                                                                                | 2.4%  | 2.4%  | 2.4%  | 2.4%  | 2.1%  | 0.7%  | 0.7%  | 0.7%  | 0.2% |       |       |       |       |       |       |       |       |       |       |       |       |       |       |       |       |       |       |  |
| Q2031a - T. brachyuri CLADE          | 1.7%                                                                                                                                                                                                                                                                                                                                                                                                                                                                                                                                                                                                                                                                                                                                                                                                                                                                | 1.4%  | 1.4%  | 1.4%  | 1.4%  | 1.2%  | 0.0%  | 0.0%  | 0.0%  | 0.6% | 0.7%  |       |       |       |       |       |       |       |       |       |       |       |       |       |       |       |       |       |  |
| Theileria brachyuri (DQ437684)       | 1.4%                                                                                                                                                                                                                                                                                                                                                                                                                                                                                                                                                                                                                                                                                                                                                                                                                                                                | 1.2%  | 1.2%  | 1.2%  | 1.7%  | 1.4%  | 0.2%  | 0.2%  | 0.2%  | 0.8% | 1.0%  | 0.2%  |       |       |       |       |       |       |       |       |       |       |       |       |       |       |       |       |  |
| Theileria sp. B16 (MG251437)         | 3.4%                                                                                                                                                                                                                                                                                                                                                                                                                                                                                                                                                                                                                                                                                                                                                                                                                                                                | 3.0%  | 3.0%  | 3.0%  | 3.0%  | 2.7%  | 3.8%  | 3.8%  | 3.8%  | 4.7% | 4.9%  | 3.8%  | 4.2%  |       |       |       |       |       |       |       |       |       |       |       |       |       |       |       |  |
| Theileria sp. B60 (MG251439)         | 3.4%                                                                                                                                                                                                                                                                                                                                                                                                                                                                                                                                                                                                                                                                                                                                                                                                                                                                | 3.0%  | 3.0%  | 3.0%  | 3.0%  | 2.7%  | 3.8%  | 3.8%  | 3.8%  | 4.7% | 4.9%  | 3.8%  | 4.2%  | 0.0%  |       |       |       |       |       |       |       |       |       |       |       |       |       |       |  |
| Theileria sp. B43 (MG251438)         | 4.0%                                                                                                                                                                                                                                                                                                                                                                                                                                                                                                                                                                                                                                                                                                                                                                                                                                                                | 3.6%  | 3.6%  | 3.6%  | 3.6%  | 3.2%  | 3.6%  | 3.6%  | 3.6%  | 4.7% | 4.9%  | 3.6%  | 4.0%  | 1.4%  | 1.4%  |       |       |       |       |       |       |       |       |       |       |       |       |       |  |
| Theileria apogeana (MG758116)        | 3.4%                                                                                                                                                                                                                                                                                                                                                                                                                                                                                                                                                                                                                                                                                                                                                                                                                                                                | 3.0%  | 3.0%  | 3.0%  | 3.7%  | 3.4%  | 4.1%  | 4.1%  | 4.1%  | 4.3% | 4.6%  | 4.1%  | 3.7%  | 5.9%  | 5.9%  | 5.0%  |       |       |       |       |       |       |       |       |       |       |       |       |  |
| Q2031b - CLADE E                     | 4.6%                                                                                                                                                                                                                                                                                                                                                                                                                                                                                                                                                                                                                                                                                                                                                                                                                                                                | 4.2%  | 4.2%  | 4.2%  | 5.1%  | 5.6%  | 5.4%  | 5.4%  | 5.4%  | 4.6% | 4.8%  | 5.4%  | 4.9%  | 7.9%  | 7.9%  | 6.7%  | 4.1%  |       |       |       |       |       |       |       |       |       |       |       |  |
| Theileria worthingtonorum (MG758114) | 5.5%                                                                                                                                                                                                                                                                                                                                                                                                                                                                                                                                                                                                                                                                                                                                                                                                                                                                | 5.1%  | 5.1%  | 5.1%  | 6.0%  | 6.5%  | 6.2%  | 6.2%  | 6.2%  | 5.3% | 5.5%  | 6.2%  | 5.7%  | 7.2%  | 7.2%  | 6.6%  | 4.6%  | 1.4%  |       |       |       |       |       |       |       |       |       |       |  |
| P92 and P68 - CLADE D                | 4.9%                                                                                                                                                                                                                                                                                                                                                                                                                                                                                                                                                                                                                                                                                                                                                                                                                                                                | 4.4%  | 4.4%  | 4.4%  | 5.3%  | 5.8%  | 5.5%  | 5.5%  | 5.5%  | 4.9% | 5.1%  | 5.5%  | 5.0%  | 8.0%  | 8.0%  | 6.9%  | 4.0%  | 0.9%  | 0.4%  |       |       |       |       |       |       |       |       |       |  |
| Theileria sp. (MF576261)             | 6.8%                                                                                                                                                                                                                                                                                                                                                                                                                                                                                                                                                                                                                                                                                                                                                                                                                                                                | 6.3%  | 6.3%  | 6.3%  | 7.3%  | 7.9%  | 7.9%  | 7.9%  | 7.9%  | 7.3% | 7.6%  | 7.9%  | 7.3%  | 10.0% | 10.0% | 10.8% | 7.9%  | 4.2%  | 2.3%  | 2.8%  |       |       |       |       |       |       |       |       |  |
| Theileria sp. (MF136488)             | 6.3%                                                                                                                                                                                                                                                                                                                                                                                                                                                                                                                                                                                                                                                                                                                                                                                                                                                                | 5.8%  | 5.8%  | 5.8%  | 5.8%  | 6.3%  | 4.8%  | 4.8%  | 4.8%  | 4.2% | 4.4%  | 4.8%  | 5.3%  | 5.5%  | 5.5%  | 5.2%  | 9.0%  | 6.1%  | 6.6%  | 5.9%  | 8.2%  |       |       |       |       |       |       |       |  |
| Theileria palmeri (MG758113)         | 10.4%                                                                                                                                                                                                                                                                                                                                                                                                                                                                                                                                                                                                                                                                                                                                                                                                                                                               | 9.6%  | 9.6%  | 9.6%  | 8.3%  | 8.9%  | 8.2%  | 8.2%  | 8.2%  | 7.1% | 7.4%  | 8.2%  | 8.8%  | 10.0% | 10.0% | 10.8% | 12.0% | 7.1%  | 7.2%  | 8.0%  | 6.0%  | 7.4%  |       |       |       |       |       |       |  |
| TB111 - CLADE A                      | 8.3%                                                                                                                                                                                                                                                                                                                                                                                                                                                                                                                                                                                                                                                                                                                                                                                                                                                                | 7.8%  | 7.8%  | 7.8%  | 6.8%  | 6.4%  | 5.8%  | 5.8%  | 5.8%  | 5.5% | 5.7%  | 5.8%  | 6.3%  | 9.0%  | 9.0%  | 9.3%  | 9.3%  | 8.0%  | 8.1%  | 8.3%  | 7.6%  | 6.7%  | 7.3%  |       |       |       |       |       |  |
| TB105 - CLADE A                      | 8.3%                                                                                                                                                                                                                                                                                                                                                                                                                                                                                                                                                                                                                                                                                                                                                                                                                                                                | 7.8%  | 7.8%  | 7.8%  | 6.8%  | 6.4%  | 5.8%  | 5.8%  | 5.8%  | 5.5% | 5.7%  | 5.8%  | 6.3%  | 9.0%  | 9.0%  | 9.3%  | 9.3%  | 8.0%  | 8.1%  | 8.3%  | 7.6%  | 6.7%  | 7.3%  | 0.0%  |       |       |       |       |  |
| Q2377 - CLADE A                      | 8.3%                                                                                                                                                                                                                                                                                                                                                                                                                                                                                                                                                                                                                                                                                                                                                                                                                                                                | 7.8%  | 7.8%  | 7.8%  | 6.9%  | 6.4%  | 5.9%  | 5.9%  | 5.9%  | 5.9% | 6.1%  | 5.9%  | 6.3%  | 9.0%  | 9.0%  | 9.3%  | 9.9%  | 8.6%  | 8.7%  | 8.9%  | 8.0%  | 7.2%  | 7.8%  | 0.4%  | 0.4%  |       |       |       |  |
| Theileria sp. (MF136494)             | 5.9%                                                                                                                                                                                                                                                                                                                                                                                                                                                                                                                                                                                                                                                                                                                                                                                                                                                                | 5.4%  | 5.4%  | 5.4%  | 5.4%  | 5.0%  | 3.4%  | 3.4%  | 3.4%  | 3.6% | 3.9%  | 3.4%  | 3.7%  | 6.1%  | 6.1%  | 6.5%  | 7.8%  | 7.9%  | 9.6%  | 8.7%  | 12.4% | 4.8%  | 9.9%  | 7.8%  | 7.8%  | 8.3%  |       |       |  |
| Theileria fuliginosa (DQ437686)      | 9.0%                                                                                                                                                                                                                                                                                                                                                                                                                                                                                                                                                                                                                                                                                                                                                                                                                                                                | 8.5%  | 8.5%  | 8.5%  | 9.6%  | 10.2% | 10.2% | 10.2% | 10.2% | 9.6% | 9.9%  | 10.2% | 9.5%  | 12.6% | 12.6% | 13.5% | 10.2% | 6.0%  | 4.2%  | 4.8%  | 1.5%  | 10.6% | 8.1%  | 10.0% | 10.0% | 10.4% | 15.3% |       |  |
| Theileria sp. (MF136493)             | 14.0%                                                                                                                                                                                                                                                                                                                                                                                                                                                                                                                                                                                                                                                                                                                                                                                                                                                               | 13.1% | 13.1% | 13.1% | 11.5% | 10.8% | 11.2% | 11.2% | 11.2% | 9.8% | 10.1% | 11.2% | 11.9% | 10.6% | 10.6% | 10.2% | 12.6% | 17.5% | 14.6% | 15.6% | 18.6% | 10.4% | 12.3% | 12.1% | 12.1% | 12.9% | 10.0% | 21.4% |  |
